# Supplementary material for: Morphological and Molecular Identification of Anisakis spp. (Nematoda: Anisakidae) in Commercial Fish from the Canary Islands Coast (Spain): Epidemiological Data
Source: MDPI journal article supplement (doi:10.3390/ani12192634), 2022-09-30
Supplement: s1 [file s1]

**Table S1.** GenBank accession numbers of *Anisakis* larvae obtained from commercial fishes from the Canary Islands coast (Spain), examined during October 2020- December 2021.

| <i>Anisakis</i> larva ID | Fish species                 | ITS1                           | mtDNA <i>cox2</i>                                   | GenBank Access numbers                         |
|--------------------------|------------------------------|--------------------------------|-----------------------------------------------------|------------------------------------------------|
| Y5                       | <i>Scomber scombrus</i>      | <i>Anisakis simplex</i> (s.s.) | <i>Anisakis simplex</i> (s.s.)                      | ITS1: OM328182<br>mtDNA <i>cox2</i> : OM417318 |
| Y32                      | <i>Scomber scombrus</i>      | <i>Anisakis simplex</i> (s.s.) | <i>Anisakis simplex</i> (s.s.)                      | ITS1: OM328167<br>mtDNA <i>cox2</i> : OM417320 |
| Y47                      | <i>Merluccius merluccius</i> | <i>Anisakis pegreffii</i>      | <i>Anisakis pegreffii</i>                           | ITS1: OM328168<br>mtDNA <i>cox2</i> : OM417321 |
| Y50                      | <i>Merluccius merluccius</i> | <i>Anisakis pegreffii</i>      | <i>Anisakis pegreffii</i>                           | ITS1: OM328181<br>mtDNA <i>cox2</i> : OM417323 |
| Y70                      | <i>Merluccius merluccius</i> | <i>Anisakis pegreffii</i>      | <i>Anisakis pegreffii</i>                           | ITS1: OM328183<br>mtDNA <i>cox2</i> : OM417322 |
| RANi26                   | <i>Merluccius merluccius</i> | <i>Anisakis simplex</i> (s.s.) | <i>Anisakis simplex</i> (s.s.)                      | ITS1: OM328178<br>mtDNA <i>cox2</i> : OM417311 |
| RANi29                   | <i>Merluccius merluccius</i> | <i>Anisakis simplex</i> (s.s.) | <i>Anisakis simplex</i> x <i>Anisakis pegreffii</i> | ITS1: OM328179<br>mtDNA <i>cox2</i> : OM417312 |
| RANi30                   | <i>Scomber colias</i>        | <i>Anisakis physeteris</i>     | No sequence obtained                                | ITS1: OM328180                                 |
| RANi34                   | <i>Scomber colias</i>        | <i>Anisakis nascettii</i>      | <i>Anisakis nascettii</i>                           | ITS1: OM328166<br>mtDNA <i>cox2</i> : OM417315 |
| RANi100                  | <i>Auxis thazard</i>         | <i>Anisakis simplex</i> (s.s.) | <i>Anisakis simplex</i> (s.s.)                      | ITS1: OM328160<br>mtDNA <i>cox2</i> : OM417314 |
| RANi101                  | <i>Auxis thazard</i>         | <i>Anisakis simplex</i> (s.s.) | <i>Anisakis simplex</i> x <i>Anisakis pegreffii</i> | ITS1: OM328161<br>mtDNA <i>cox2</i> : OM417313 |
| RANi102                  | <i>Auxis thazard</i>         | <i>Anisakis simplex</i> (s.s.) | <i>Anisakis simplex</i> (s.s.)                      | ITS1: OM328162<br>mtDNA <i>cox2</i> : OM417319 |
| RANi103                  | <i>Auxis thazard</i>         | <i>Anisakis simplex</i> (s.s.) | <i>Anisakis simplex</i> (s.s.)                      | ITS1: OM328163<br>mtDNA <i>cox2</i> : OM417316 |
| RANi105                  | <i>Auxis thazard</i>         | <i>Anisakis pegreffii</i>      | <i>Anisakis pegreffii</i>                           | ITS1: OM328164<br>mtDNA <i>cox2</i> : OM417325 |
| RANi106                  | <i>Auxis thazard</i>         | <i>Anisakis simplex</i> (s.s.) | <i>Anisakis simplex</i> (s.s.)                      | ITS1: OM328159<br>mtDNA <i>cox2</i> : OM417317 |
| RANi107                  | <i>Auxis thazard</i>         | <i>Anisakis typica</i>         | <i>Anisakis typica</i>                              | ITS1: OM328165<br>mtDNA <i>cox2</i> : OM417324 |
